# Supplementary material
Source: Springer Nature journal article supplement (https://www.springermedizin.de/resource/supplementary/12889_2010_3154_MOESM1_ESM.pdf/9488202)

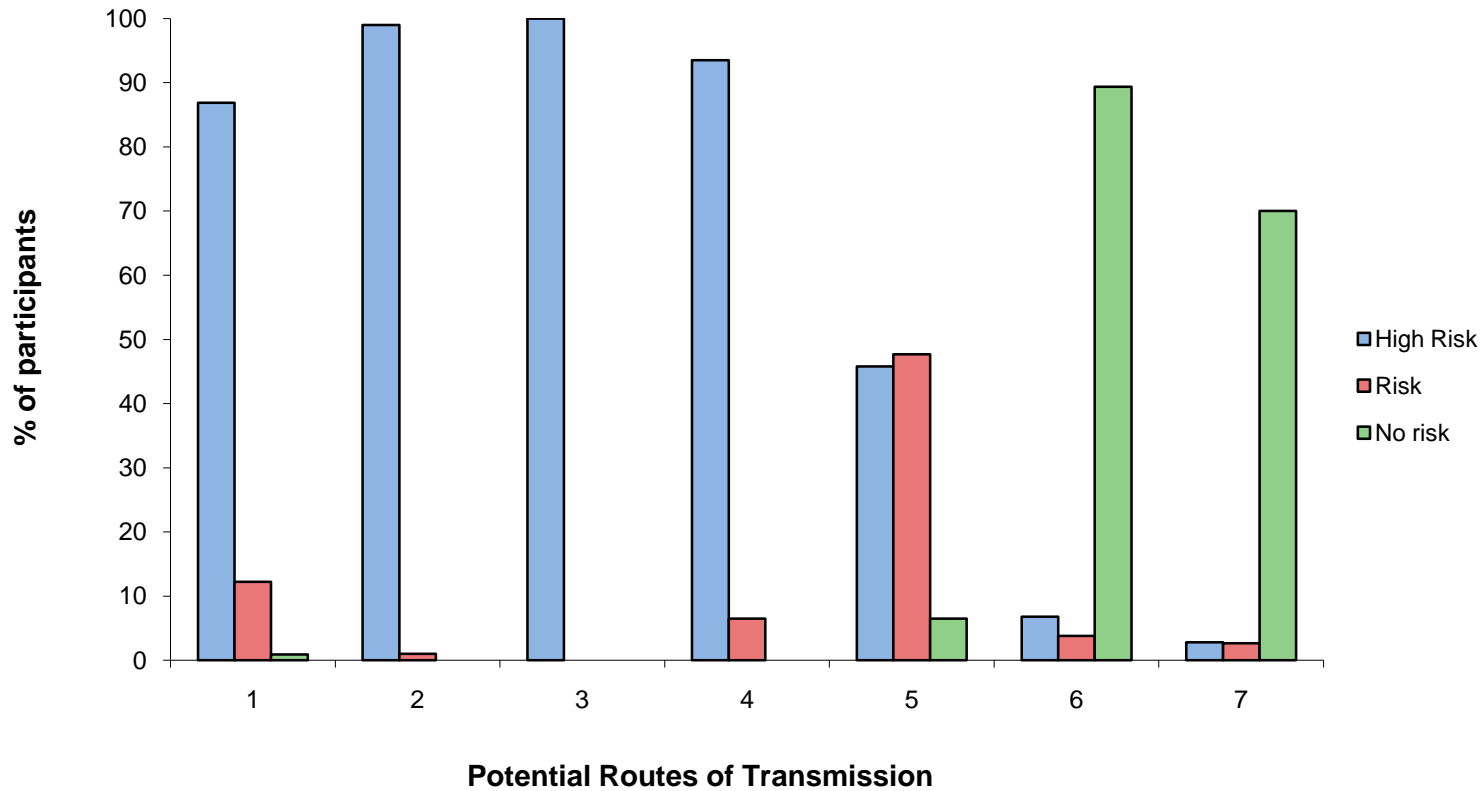

Supplement: MOESM1 [file 9488202]
